# Supplementary material for: A National Survey on the Clinical Practice Patterns of Korean Medicine Doctors for Attention Deficit Hyperactivity Disorder (ADHD) in Children and Adolescents
Source: Children (Basel). 2023 Aug 31;10(9):1490. doi: 10.3390/children10091490 (PMC10529033; doi:10.3390/children10091490)
Supplement: Supplementary file 1 [file children-10-01490-s001.zip › children-2530025-Table S1.xlsx]

## Sheet: Sheet1
Survey on the clinical practice patterns of Korean medicine doctors for Attention Deficit Hyperactivity Disorder (ADHD) in children and adolescents
	N	ratio (%)
Ⅰ. Current status of treatment for ADHD in children
1. On the basis of the last 1 year, What is the monthly average number of first-time patients with ADHD in children and adolescents?
≤ 5	475	88.4544
6–10	37	6.89013
11–15	15	2.7933
16–20	5	0.931099
≥ 21	5	0.931099
2. On the basis of the last 1 year, What is the average treatment period for ADHD patients in children and adolescents who visited the hospital?
< 1 month	146	27.1881
≥ 1 month to < 3 months	159	29.6089
≥ 3 month to < 6 months	138	25.6983
≥ 6 month to < 1 year	69	12.8492
≥ 1 year to < 3 years	22	4.09683
≥ 3 years	3	0.558659
3. On the basis of the last 1 year, what is the average cost of treatment (copay) for children and adolescents with ADHD? (If decoction is included, it is calculated by dividing the total cost by the number of days of treatment days.)
< KRW 5,000	26	4.84171
5,000 or more and less than 10,000	66	12.2905
10,000 or more and less than 20,000	175	32.5885
20,000 or more and less than 50,000	134	24.9534
50,000 or more and less than 100,000	62	11.5456
≥ 100,000	74	13.7803
4. On the basis of the last 1 year, what is the main age group of children and adolescents with ADHD receiving treatment? (Select up to 3 that apply)
Preschool children (1 or more and less than 7 years)	131	15.2326
Children in early elementary school (7–9 years)	406	47.2093
Children in the upper grades of elementary school (10–12 years)	224	26.0465
Middle school students (13–15 years)	69	8.02326
High-school students and above (≥ 16 years)	30	3.48837
5. On the basis of the last 1 year, among children and adolescents with ADHD who are being treated, what is the proportion of concurrent Western treatment for ADHD?
0	64	11.9181
1 or more and less than 25%	97	18.0633
25 or more and less than 50%	130	24.2086
50 or more and less than 75%	126	23.4637
75 or more and less than 100%	120	22.3464
5-1. What type of treatment is mainly performed when a child and adolescents with undergoing treatment receives Western treatment at the same time? (Select up to 3 that apply)
Medication (e.g. methylphenidate, atomoxetine, etc.)	422	43.7306
Educational interventions (behavior therapy in schools)	80	8.29016
Cognitive Behavioral Therapy	188	19.4819
Social skills training	16	1.65803
Psychotherapy	48	4.97409
Sensory integration therapy	25	2.59067
EEG biofeedback (e.g. neurofeedback)	35	3.62694
Parent and family counseling	149	15.4404
Other (specify : )	2	0.207254
6. During the past 1 year, during the treatment of children and adolescents with ADHD, how many cases were referred to western medical institutions? (Including cases of direct request, excluding cases of simply recommending treatment)
0	442	82.3091
1–5	79	14.7114
6–10	13	2.42086
11–15	3	0.558659
16–20	0	0
≥ 21	0	0
6-1. What was the main purpose of referral to a western medical institution during the treatment of patients with ADHD in children and adolescents?
For diagnosis and examination of ADHD	46	48.4211
To prescribe Western medicine	34	35.7895
For psychotherapy	14	14.7368
Other (specify : )	1	1.05263
Ⅱ. Diagnosis
1. Do you use pattern identification when treating children and adolescents with ADHD?
It is treated by prescriptions commonly used for the disease without using pattern identification.	139	25.8845
Use pattern identification to treat.	398	74.1155
1-1. When treating children and adolescents with ADHD patients according to pattern identification, What is the main diagnostic method used for children and adolescents with ADHD?
pattern identification of Qi, Blood, Fluid, Humor, and Organ system diagnosis (氣血津液臟腑辨證) based on KM textbooks	250	62.8141
Six-Meridian pattern identification (六經辨證)	47	11.809
pattern identification of Sasang constitutional (四象醫學) diagnosis	87	21.8593
Other (specify : )	14	3.51759
1-2. What are the names of pattern identification used for children and adolescents with ADHD? (Select up to 3 that apply)
kidney deficiency and liver hyperactivity (腎虛肝亢)	83	13.5621
dual deficiency of the heart-spleen (心脾兩虛)	94	15.3595
phlegm-fire harassing the heart (痰火擾心)	95	15.5229
spleen deficiency and liver effulgence (脾虛肝旺)	40	6.53595
dual deficiency of the heart-kidney (心腎兩虛)	47	7.67974
internal obstruction of static blood (瘀血內阻)	4	0.653595
effulgent heart-liver fire (心肝火旺)	92	15.0327
essence-blood deficiency (精血虧虛)	14	2.28758
heart yin deficiency (心陰虧虛)	22	3.59477
depressed liver qi transforming into fire (肝鬱化火)	121	19.7712
Other (specify : )	0	0
2. What diagnostic tool is being used for children and adolescents with ADHD? (Select up to 3 that apply)
DSM-5	174	22.8947
DSM-Ⅳ	97	12.7632
It is judged through clinical symptoms without using assessment tools.	347	45.6579
Evaluation through referral to other medical institutions or medical records of other medical institutions	133	17.5
Other (specify : )	9	1.18421
Ⅲ. Treatment
1. What is the main treatment for children and adolescents with ADHD? (Select up to 3 that apply)
Herbal medicine	521	44.19
Acupuncture	348	29.5165
Electroacupuncture	56	4.74979
Moxibustion	98	8.31213
Cupping therapy	37	3.13825
Pharmacopuncture	38	3.22307
Manipulation / Exercise therapy	53	4.49534
Others (specify : )	28	2.37489
1-1. What types of herbal medicine formulations are mainly used for children and adolescents with ADHD? (Select up to 3 that apply)
Compound herbal decoction	497	67.1622
Distillation of the compound herbal decoctions	32	4.32432
Powder preparation	18	2.43243
Pill preparation	32	4.32432
Mixture of soluble granules covered by insurance	44	5.94595
Soft extract covered by insurance	50	6.75676
Mixture of soluble granules not covered by insurance	38	5.13514
Soft extract not covered by insurance	29	3.91892
Others (specify : )	0	0
1-2. What is the name of the herbal medicine prescription mainly used for children and adolescents with ADHD? (Select up to 5 that apply)
Jwagui-eum	19	1.21173
Gammaekdaejo-tang	130	8.29082
Ondam-tang (including Gamiondam-tang and Hwangryeonondam-tang)	265	16.9005
Gwibi-tang (including Gamigwibi-tang)	210	13.3929
Sayeok-san	26	1.65816
Yukmijihwang-tang	91	5.80357
Sihogayonggolmoryeo-tang	226	14.4133
Gyejigayonggolmoryeo-tang	71	4.52806
Eokgan-san (including Eokgan-san-gabanhajinpi)	246	15.6888
Gamisoyo-san	115	7.33418
Bosimgeonbi-tang	30	1.91327
Bojungikgi-tang	50	3.18878
Hwangryeonhaedok-tang	30	1.91327
Jodeung-san	13	0.829082
Others (specify : )	46	2.93367
1-3. When treating children and adolescents with ADHD with herbal medicines, if herbal medicines are frequently used, what are they? (Select up to 3 that apply)
Polygalae Radix (遠志)	328	25.4658
Rehmanniae Radix Preparat (熟地黃)	121	9.39441
Poria (茯苓)	238	18.4783
Acori Graminei Rhizoma (石菖蒲)	260	20.1863
Zizyphi Spinosae Semen (酸棗仁)	203	15.7609
Chinemydis Plastrum (龜板)	17	1.31988
Trionycis Carapax (鱉甲)	6	0.465839
Glycyrrhizae Radix (甘草)	56	4.34783
Others (specify : )	59	4.58075
1-4. What is the recommended average duration of herbal medicine treatment for children and adolescents with ADHD?
< 1 month	26	4.9904
1 month or more and less than 3 months	168	32.2457
3 months or more and less than 6 months	233	44.7217
6 months or more and less than 1 year	67	12.8599
1 year or more and less than 3 year	23	4.41459
≥ 3 years	4	0.767754
1-5. What is the most commonly used acupuncture method for children and adolescents with ADHD? (Select up to 3 that apply)
Meridian points acupuncture (經穴鍼術)	267	49.5362
Sa-am acupuncture therapy (舍巖鍼法)	92	17.0686
Five element acupuncture (五行鍼法)	40	7.42115
Constitutional acupuncture (體質鍼法)	27	5.00928
Auricular acupuncture	42	7.79221
Intradermal acupuncture (皮內鍼)	32	5.93692
dermal acupuncture (皮膚鍼)	37	6.86456
Others (specify : )	2	0.371058
1-6. Which acupuncture points are mainly used for acupoints in children and adolescents with ADHD? (Select up to 5 that apply)
PC6 (內關)	191	14.9335
LI4 (合谷)	183	14.3081
LR3 (太衝)	143	11.1806
KI3 (太谿)	29	2.2674
GV20 (百會)	184	14.3862
EX-HN3 (印堂)	50	3.9093
EX-HN5 (太陽)	35	2.73651
GB20 (風池)	39	3.04926
GV14 (大椎)	26	2.03284
HT7 (神門)	108	8.4441
LI11 (曲池)	45	3.51837
ST36 (足三里)	81	6.33307
SP6 (三陰交)	68	5.31665
GB34 (陽陵泉)	11	0.860047
EX-HN1 (四神聰)	69	5.39484
GB13 (本神)	3	0.234558
GV26 (水溝)	2	0.156372
Others (specify : )	12	0.938233
1-7. What is the recommended average duration of acupuncture treatment for children and adolescents with ADHD?
< 1 month	19	5.45977
1 month or more and less than 3 months	107	30.7471
3 months or more and less than 6 months	126	36.2069
6 months or more and less than 1 year	72	20.6897
1 year or more and less than 3 year	18	5.17241
≥ 3 years	6	1.72414
1-8. What types of Pharmacopunctures are mainly used for children and adolescents with ADHD? (Select up to 3 that apply)
Cervi Pantotrichum Cornu (鹿茸)	13	26.5306
Hominis Placenta (紫河車)	22	44.898
Ginseng (山蔘)	7	14.2857
Others (specify : )	7	14.2857
1-9. What is the main method used for manual/exercise therapy for children and adolescents with ADHD?
Chuna manual therapy	27	50.9434
pediatric Tuina	6	11.3208
acupressure	15	28.3019
Others (specify : )	5	9.43396
Ⅳ. Perception of Korean medicine treatments
1. Based on your treatment experience, what is the overall effect of Korean medicine treatment on children and adolescents with ADHD?
Not at all effective	2	0.372439
Mostly not effective	39	7.26257
Moderate	232	43.203
Mostly effective	220	40.9683
Very effective	44	8.19367
2. Based on your treatment experience, which is the most effective Korean medicine treatment for children and adolescents with ADHD? (Select up to 3 that apply)
Herbal medicine	506	54.2918
Acupuncture	231	24.7854
Electroacupuncture	33	3.54077
Moxibustion	54	5.79399
Cupping therapy	15	1.60944
Pharmacopuncture	35	3.75536
Manipulation / Exercise therapy	40	4.29185
Others (specify : )	18	1.93133
3. What do you think are the advantages of Korean medicine treatment for children and adolescents with ADHD? (Select up to 3 that apply)
Effective	271	23.4835
Fewer side effects	389	33.7088
Economical	32	2.77296
More helpful than other treatment methods.	115	9.96534
In addition to ADHD symptoms, it can improve a patient's overall health.	346	29.9827
Other (Please specify: )	1	0.0866551
4. What do you think needs to be supplemented in Korean medicine treatment for children and adolescents with ADHD? (Select up to 3 that apply)
Diagnostic accuracy	192	15.8285
Treatment cost	324	26.7106
Therapeutic effect	103	8.49134
Treatment period	71	5.85326
Convenience of treatment (herbal medicine and acupuncture)	231	19.0437
Treatment information (promotion and awareness)	290	23.9077
Other (Please specify: )	2	0.16488
5. What items do you think need additional education for Korean medicine doctors regarding the treatment of ADHD in children and adolescents? (Select up to 3 that apply)
Diagnosis of ADHD	341	28.1121
Utilization of evaluation tools	295	24.3199
Details of herbal medicine treatment	230	18.9613
Details of non-herbal medicine treatment (acupuncture, manual therapy, etc.)	129	10.6348
Utilization of psychotherapy	210	17.3124
Other (Please specify: )	8	0.659522
Ⅴ. Safety and effectiveness
1. How often is the efficacy evaluation performed in the treatment of ADHD in children and adolescents?
1 month	196	36.4991
3 month	250	46.5549
6 month	70	13.0354
1 year	18	3.35196
Other (Please specify: )	3	0.558659
2. What are the efficacy evaluation indicators used in the treatment of ADHD in children and adolescents? (Select all that apply)
Judgment based on clinical symptoms without specific indicators	407	48.626
Numerical Rating Scale (NRS)	95	11.3501
Academic Performance Rating Scales (APRS)	51	6.09319
ADHD Rating Scale-Ⅳ (ADHD-RS-Ⅳ)	117	13.9785
Conners Parents Rating Scale-Revised (CPRS-R)	23	2.74791
Brown ADD Rating Scale (Brown ADD-RS)	12	1.43369
Child Behavior Checklist (CBCL)	15	1.79211
Home Situation Questionnaire-Revise (HSQ-R)	13	1.55317
School Situation Questionnaire-Revised (SSQ-R)	8	0.955795
Attention Diagnosis System (ADS)	38	4.54002
Comprehensive Attention Test (CAT)	36	4.30108
Wechsler Intelligence Scale	17	2.03106
Other (Please specify: )	5	0.597372
3. How often is the safety evaluation performed in the treatment of ADHD in children and adolescents?
1 month	228	42.4581
3 month	216	40.2235
6 month	71	13.2216
1 year	15	2.7933
Other (Please specify: )	7	1.30354
4. What are the safety evaluation indicators used in the treatment of children and adolescents with ADHD? (select all that apply)
Evaluation of Adverse Reactions	380	34.6399
Change in vital signs	225	20.5105
Changes in the child’s general condition	425	38.742
Blood test	47	4.28441
Urine test	17	1.54968
Other (Please specify: )	3	0.273473
Ⅵ. Demographic information
1. Sex
Male	375	69.8324
Female	162	30.1676
2. Age
≤ 29	22	4.09683
30–39	176	32.7747
40–49	208	38.7337
50–59	112	20.8566
≥ 60	19	3.53818
3. Years of clinical experience
< 5 years	70	13.0354
5 years or more and less than 10 years	109	20.298
10 years or more and less than 15 years	127	23.6499
15 years or more and less than 20 years	95	17.6909
20 years or more and less than 30 years	107	19.9255
≥ 30 years	29	5.40037
4. Place of work
Seoul Metropolitan City	170	31.6574
Busan Metropolitan city	39	7.26257
Daegu Metropolitan city	44	8.19367
Gwangju Metropolitan city	7	1.30354
Incheon Metropolitan city	21	3.91061
Daejeon Metropolitan city	21	3.91061
Ulsan Metropolitan city	8	1.48976
Gyeonggi-do	129	24.0223
Gangwon-do	11	2.04842
Chungcheongbuk-do	11	2.04842
Chungcheongnam-do	10	1.8622
Jeollabuk-do	8	1.48976
Jeollanam-do	15	2.7933
Gyeongsangbuk-do	17	3.16574
Gyeongsangnam-do	20	3.72439
Jeju-do	4	0.744879
Sejong Metropolitan Autonomous City	2	0.372439
5. Specialist training
No	382	71.1359
Yes	155	28.8641
5-1. Specialty
Internal Korean Medicine	42	27.0968
Korean Medicine Obstetrics and Gynecology	13	8.3871
Korean Medicine Pediatrics	16	10.3226
Korean Medicine Neuropsychiatry	19	12.2581
Korean Medicine Ophthalmology, Otolaryngology, and Dermatology	13	8.3871
Korean Medicine Rehabilitation	12	7.74194
Korean acupuncture and moxibustion medicine	35	22.5806
Sasang Constitutional Medicine	5	3.22581
6. Level of healthcare facility of affiliated institution
Korean medicine clinics (primary healthcare institutions)	411	76.5363
Korean Medicine Hospital (not a university hospital)	52	9.68343
university teaching Korean medicine hospitals	36	6.70391
convalescent hospital	20	3.72439
Public health center/health center branch/army	13	2.42086
National Medical Center	3	0.558659
Other (Please specify: )	2	0.372439
